# Supplementary material for: Glypican-3-targeted macrophages delivering drug-loaded exosomes offer efficient cytotherapy in mouse models of solid tumours
Source: PubMed Central journal article supplement — Nat Commun. 2024 Sep 23;15:8203. doi: 10.1038/s41467-024-52500-5 (PMC11420241; doi:10.1038/s41467-024-52500-5), 2024-09-23
Supplement: 41467_2024_52500_MOESM1_ESM.pdf [file 41467_2024_52500_MOESM1_ESM.pdf]

# **Glypican-3-targeted Macrophages Delivering Drug-loaded Exosomes Offer Efficient Cytotherapy in Mouse Models of Solid Tumours**

Jinhu Liu<sup>1</sup>, Huajun Zhao<sup>1</sup>, Tong Gao<sup>1</sup>, Xinyan Huang<sup>1</sup>, Shujun Liu<sup>1</sup>, Meichen Liu<sup>1</sup>, Weiwei Mu<sup>1</sup>, Shuang Liang<sup>1</sup>, Shunli Fu<sup>1</sup>, Shijun Yuan<sup>1</sup>, Qinglin Yang<sup>1</sup>, Panpan Gu<sup>1</sup>, Nan Li<sup>1</sup>, Qingping Ma<sup>1</sup>, Jie Liu<sup>1</sup>, Xinke Zhang<sup>1</sup>, Na Zhang<sup>1\*</sup>, Yongjun Liu<sup>1\*</sup>

<sup>1</sup>NMPA Key Laboratory for Technology Research and Evaluation of Drug Products and Key Laboratory of Chemical Biology (Ministry of Education), Department of Pharmaceutics, School of Pharmaceutical Sciences, Cheeloo College of Medicine, Shandong University, 44 Wenhuxi Road, Jinan, Shandong Province 250012, China

\*Corresponding author.

E-mail: liuyongjun@sdu.edu.cn (Yongjun Liu); zhangnancy9@sdu.edu.cn (Na Zhang)

## Table of contents

### Supplementary Figures

Figure S1. The prescription screens and stability of RILO.

Figure S2. The optimizations of incubation concentration and time on cell viability and DL.

Figure S3. Endocytic pathways and the subsequent intracellular trafficking of C6-LO in M1-type macrophages.

Figure S4. Synthesis and characterization of GTP, DSPE-PEG<sub>5k</sub> and DSPE-PEG<sub>5k</sub>-GTP.

Figure S5. The optimizations of incubation concentrations and time on cell viability and GTP carrying.

Figure S6. Release profiles of total drugs from RILO@MG.

Figure S7. The uptake experiments of C6-exosomes released from different formulations.

Figure S8. Effect of anchoring of GTP on phagocytosis.

Figure S9. The phenotype analysis of adoptively transferred macrophage and TAM after injection.

Figure S10. Tumour weights, average tumour growth curves and body weight changes over the course of treatment related to Fig. 5k-m.

Figure S11. Tumour inhibition rate calculated based on Fig. 6d.

Figure S12. Representative images of tumour tissue sections related to Fig. 6a-f.

Figure S13. Representative images of major organs by microscopic pathological analysis related to Fig. 6a-f.

Figure S14. Preliminary safety evaluation of RILO@MG.

Figure S15. Flow cytometry gating strategy for analysis of intratumoural immune cells.

Figure S16. Representative flow cytometry plots related to Fig. 7c-i.

Figure S17. The evaluation of effector memory cells and memory immune responses.

Figure S18. Efficacy validation in the orthotopic H22 tumour model related to Fig. 8a.

Figure S19. Flow cytometry data in the orthotopic H22 tumour model on Day 20 related to Fig. 8a.

Figure S20. Tumour growth curves, body weight changes and flow cytometry data in the B16F10 tumour-bearing mouse model over the course of treatment related to Fig. 8i-o.

### Supplementary Tables

Table S1. Characterization of RIL, OMV and RILO.

Table S2. Proteins identified from *E. coli* MG1655-originated OMV.

Table S3. Characterization of exosomes from Blank@M and RI-exosomes from RILO@MG- and

RILO@MG.

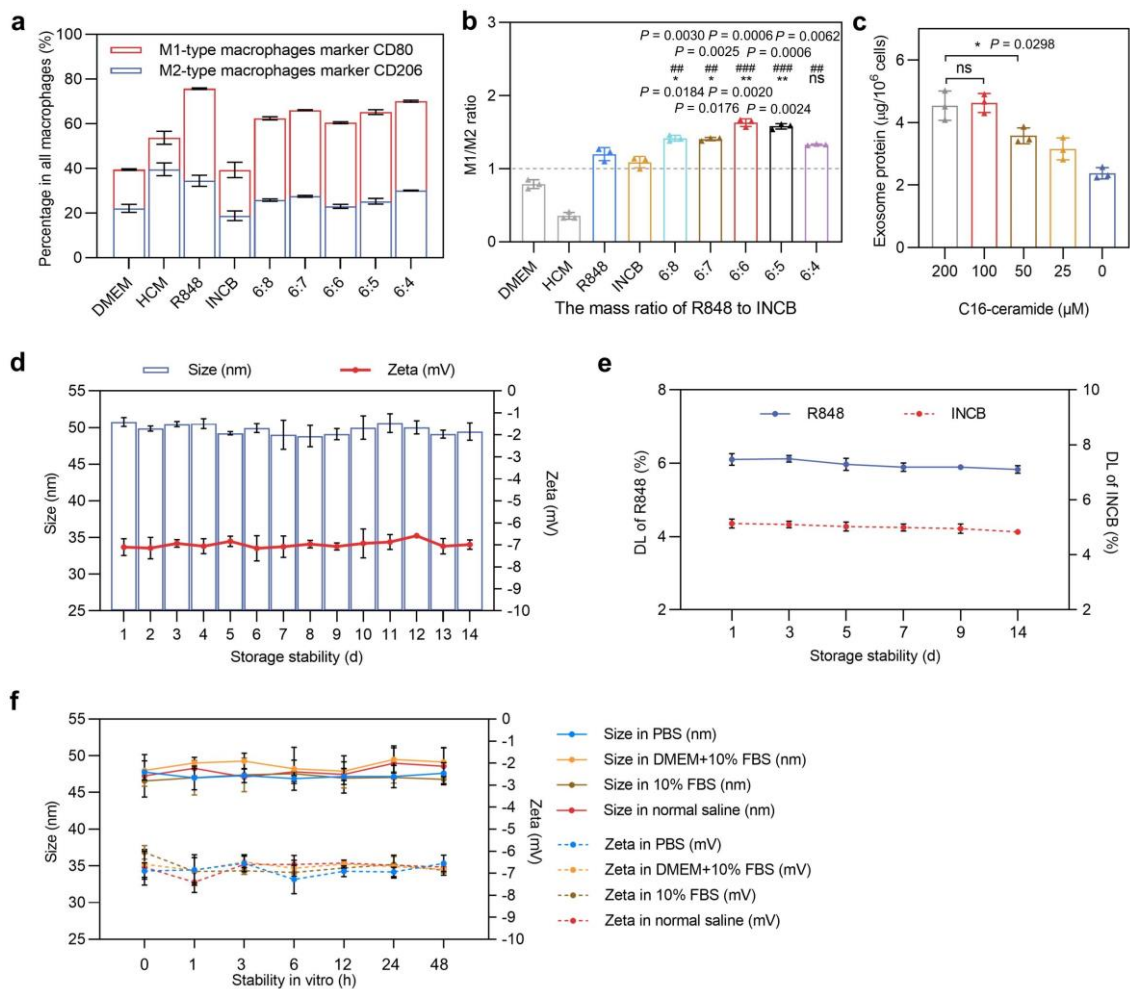

**Supplementary Fig. 1. The prescription screens and stability of RILO.** **a, b,** Effect of different mass ratio of R848 and INCB on TAM polarization. The percentage of M1-type macrophages marker CD80 and M2-type macrophages marker CD206 after incubated TAM<sup>RAW</sup> with different mass ratios of R848 and INCB for 24 h in vitro (**a**). The ratio of M1-type macrophages to M2-type macrophages after incubation of TAM<sup>RAW</sup> with different mass ratios of R848 and INCB for 24 h in vitro (**b**). TAM<sup>RAW</sup> were generated by culturing RAW264.7 cells in HCM for 24 h. \**P* and #*P* indicate statistical significance compared to the R848 or INCB group, respectively. **c,** Effect of C16-ceramide concentration on released exosomes. After M1-type macrophages<sup>RAW</sup> were treated with various concentrations of C16-ceramide, released exosomes in 24 h were quantified. **d-f,** The stability of RILO under storage or physiological conditions. The changes of size and zeta potential of freshly prepared RILO with time after storage at 4 °C (**d**). The DL changes of R848 or INCB of freshly prepared RILO with time after storage at 4 °C (**e**). The size and zeta potential of RILO after incubation at PBS, DMEM contained 10% FBS, 10% FBS and normal saline at different time points (**f**). Data are expressed as the mean ± SD with 3 biologically independent experiments. Two-tailed Student's *t* test (**b**) or one-way ANOVA with Tukey's multiple comparisons test (**c**) was carried out for statistical analysis. \**P* < 0.05; \*\**P* < 0.01; \*\*\**P* < 0.001; ns, no significance.

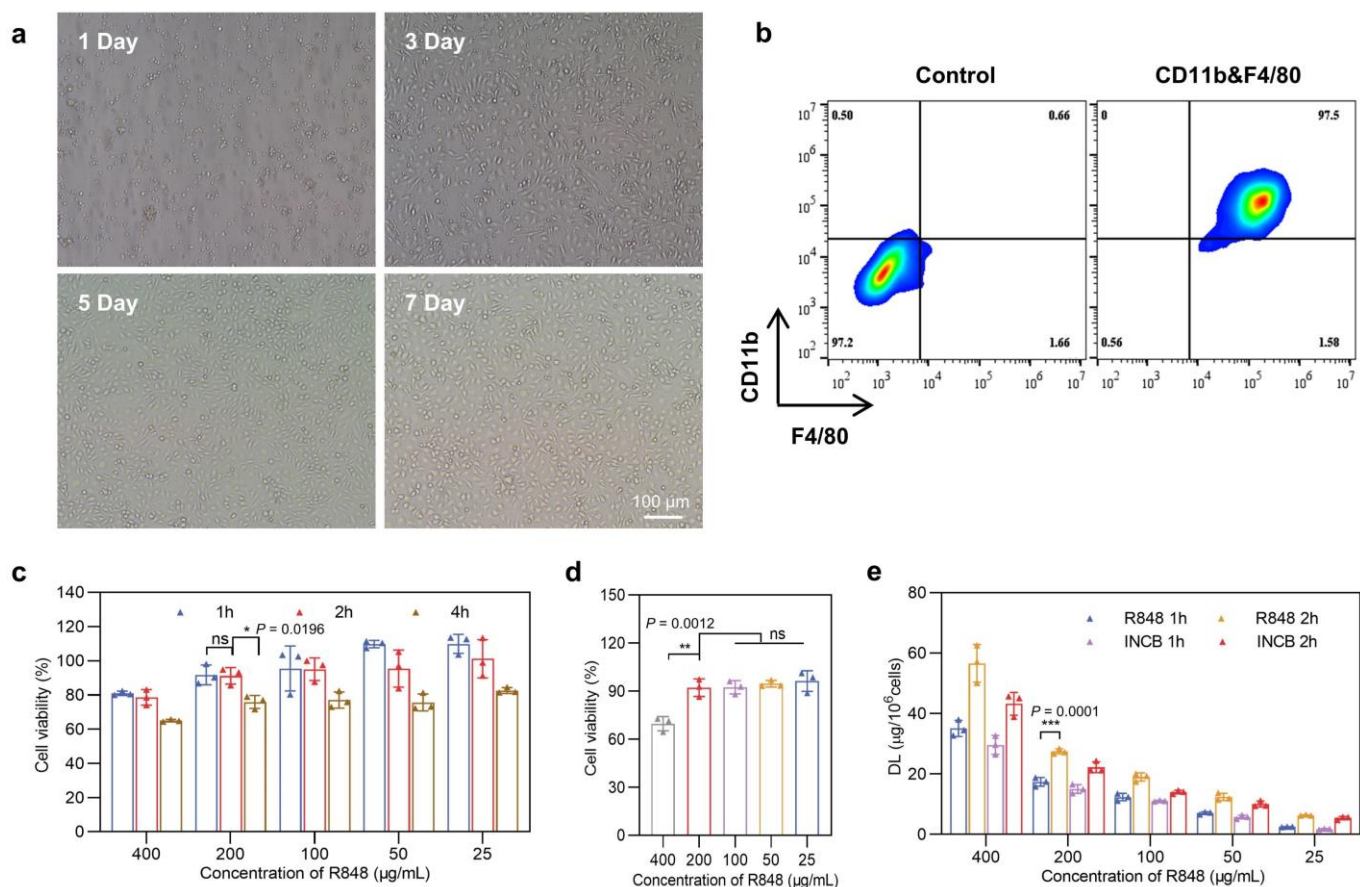

**Supplementary Fig. 2. The optimizations of incubation concentration and time on cell viability and DL.** **a, b**, Identification experiment of BMDMs ( $n = 3$  biologically independent experiments). Representative images of morphological identification (**a**). On day 1, the myeloid cells isolated from bone marrow were round and suspended in the medium. On day 3, the adherent cells were macrophages with round or fusiform after removing the unadherent cells. On day 7, the macrophages were collected for further use. Scale bar, 100  $\mu$ m. Representative flow cytometric analysis images of BMDMs formation on day 7 (**b**). Mature BMDMs were defined as CD11b<sup>+</sup>F4/80<sup>+</sup> subpopulation (upper right) with the purity displayed as percentage higher than 95%. **c**, In vitro cell viability of different incubation concentrations and time of RILO on M1-type macrophages<sup>RAW</sup> ( $n = 3$  biologically independent experiments). **d**, In vitro cell viability of different incubation concentrations of RILO on M1-type macrophages<sup>BMDM</sup> for incubating 2 h ( $n = 3$  biologically independent experiments). **e**, The DL of different incubation concentrations and time of RILO on M1-type macrophages<sup>RAW</sup> ( $n = 3$  biologically independent experiments). All data are shown as the mean  $\pm$  SD. Two-tailed Student's *t* test (**e**) or one-way ANOVA with Tukey's multiple comparisons test (**c, d**) was carried out for statistical analysis. \* $P < 0.05$ ; \*\* $P < 0.01$ ; \*\*\* $P < 0.001$ ; ns, no significance.

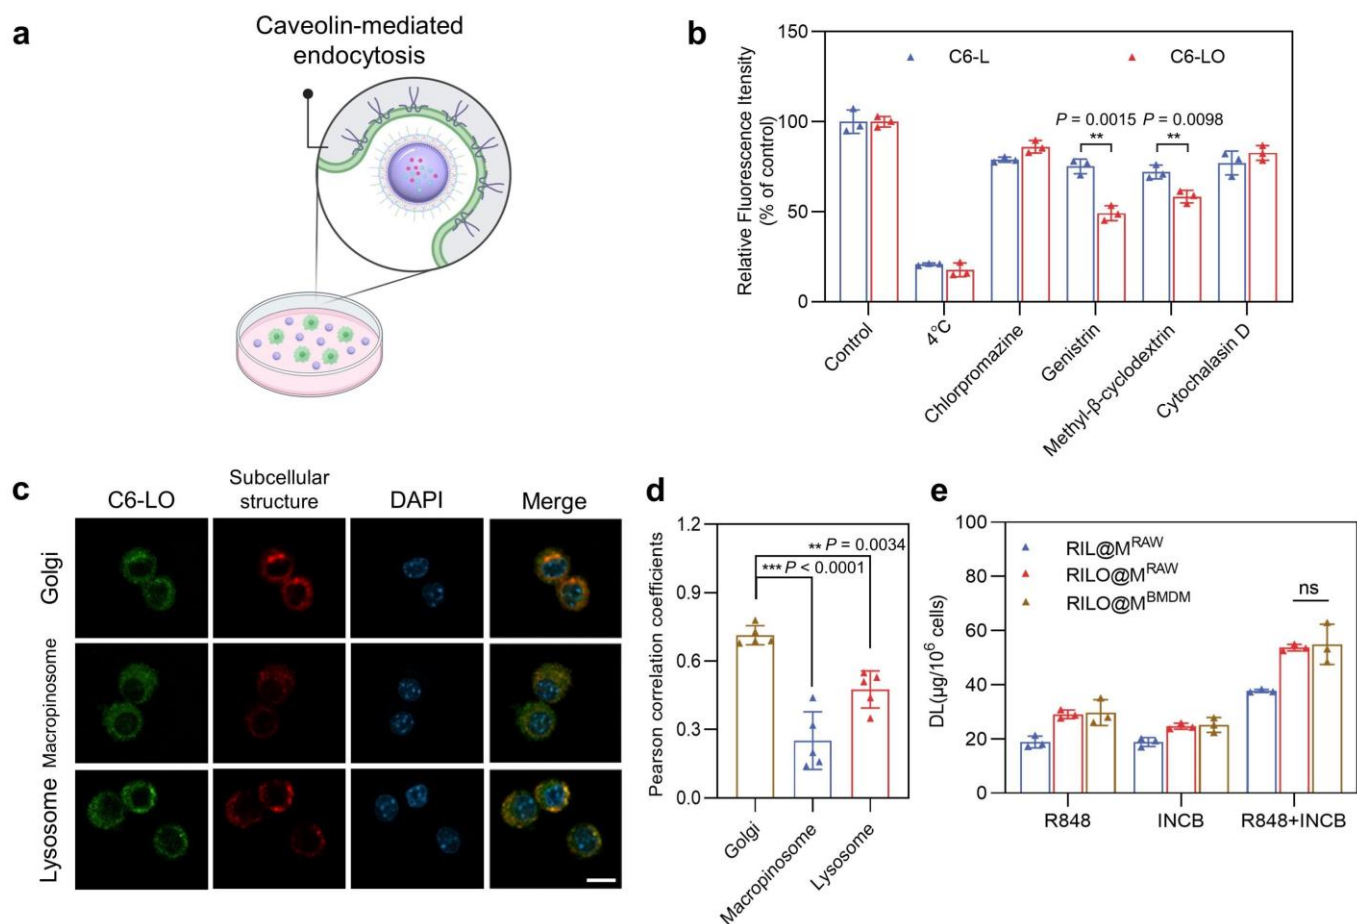

**Supplementary Fig. 3. Endocytic pathways and the subsequent intracellular trafficking of C6-LO in M1-type macrophages.** **a**, Schematic illustration of the uptake of RIL by M1-type macrophages via caveolin-mediated endocytosis. **b**, Effect of inhibitors on the uptake of C6-L or C6-LO by M1-type macrophages. Flow cytometry analysis of the inhibitor effect on the uptake of C6-L or C6-LO by M1-type macrophages in terms of C6 intensity ( $n = 3$  biologically independent experiments). M1-type macrophages were pretreated with each inhibitor for 0.5 h, and then incubated with C6-L or C6-LO (200 ng/mL) for 2 h. C6 intensity was examined by flow cytometry. **c**, **d**, Intracellular trafficking of C6-LO in M1-type macrophages. Representative confocal images of colocalization of C6-LO and golgi tracker red, macropinosome tracker (70kd RhoB-Dextran) or lysosome tracker red after 6 h cultured with M1-type macrophages<sup>RAW</sup> (**c**). Scale bar, 10  $\mu$ m. Pearson correlation coefficients (**d**) of C6-LO (green) and subcellular structure tracker (red) fluorescence calculated using Image J software by pixel intensity ( $n = 5$  biologically independent experiments). **e**, The DL of RIL@M<sup>RAW</sup>, RILO@M<sup>RAW</sup> and RILO@M<sup>BMDM</sup>. RIL@M<sup>RAW</sup>, RILO@M<sup>RAW</sup> or RILO@M<sup>BMDM</sup> was prepared by incubating RAW264.7 cells or BMDMs with RIL or RILO at 200  $\mu$ g/mL (quantified by R848) at 37  $^{\circ}$ C for 2 h ( $n = 3$  biologically independent experiments). All data are shown as the mean  $\pm$  SD and were analysed by two-tailed Student's *t* test (**b**, **e**) or one-way ANOVA with Tukey's multiple comparisons test (**d**). \*\* $P < 0.01$ ; \*\*\* $P < 0.001$ ; ns, no significance.

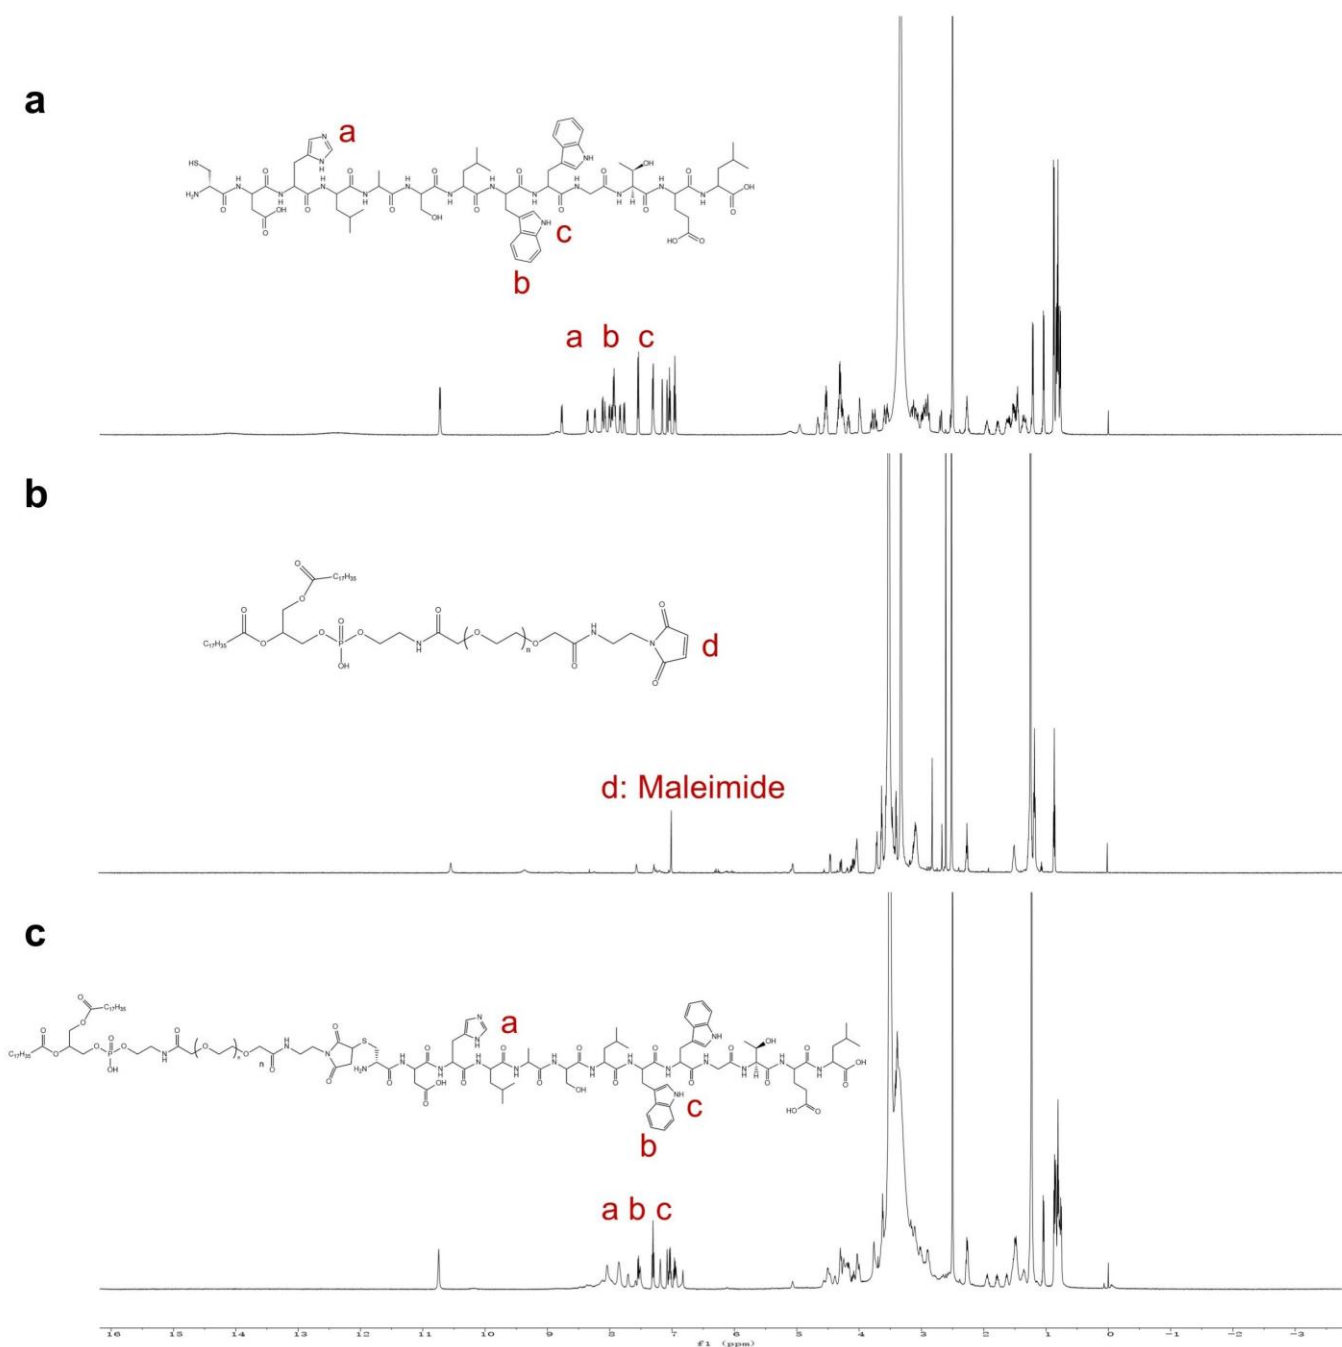

**Supplementary Fig. 4. Synthesis and characterization of GTP, DSPE-PEG<sub>5k</sub> and DSPE-PEG<sub>5k</sub>-GTP.** **a**, The <sup>1</sup>H-NMR spectrum of GTP-SH. **b**, The <sup>1</sup>H-NMR spectrum of DSPE-PEG<sub>5k</sub>-Mal. **c**, The <sup>1</sup>H-NMR spectrum of DSPE-PEG<sub>5k</sub>-GTP. GPC3-targeting material DSPE-PEG<sub>5k</sub>-GTP was synthesized through the reaction of maleimide in DSPE-PEG<sub>5k</sub>-Mal with the sulfhydryl group of GTP-SH. The characteristic peak d of maleimide at 7.00 ppm in DSPE-PEG<sub>5k</sub>-GTP disappeared, while GTP-SH related characteristic peaks a, b and c from 6.83 ppm to 8.36 ppm appeared, indicating the successful synthesis of DSPE-PEG<sub>5k</sub>-GTP. The grafting rate of GTP was 19.78±0.10% in DSPE-PEG<sub>5k</sub>-GTP determined by HPLC.

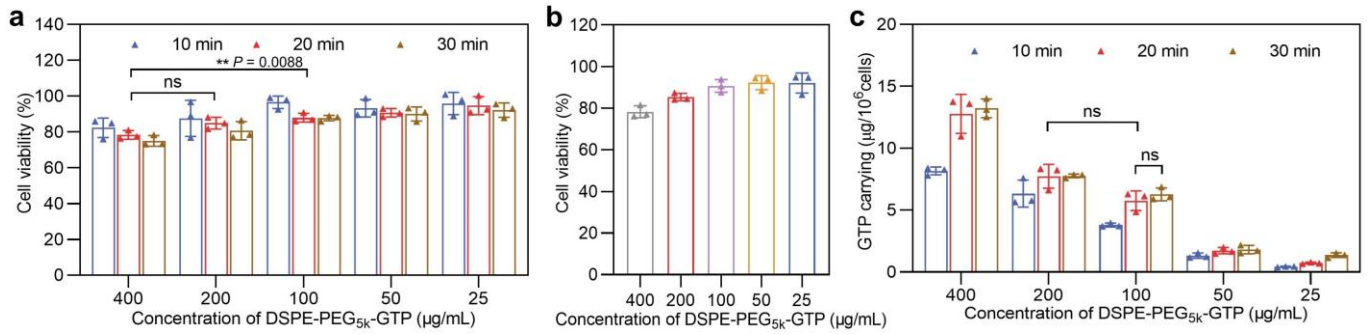

**Supplementary Fig. 5. The optimizations of incubation concentrations and time on cell viability and GTP carrying.** **a**, In vitro cell viability of different incubation concentrations and time of DSPE-PEG<sub>5k</sub>-GTP on RILO@M<sup>RAW</sup>. **b**, In vitro cell viability of different incubation concentrations of DSPE-PEG<sub>5k</sub>-GTP on RILO@M<sup>BMDM</sup> for incubating 20 min. **c**, The GTP carrying of different incubation concentrations and time of DSPE-PEG<sub>5k</sub>-GTP on RILO@M<sup>RAW</sup>. In addition, the GTP carrying of RILO@MG<sup>BMDM</sup> was  $6.67 \pm 0.64$   $\mu\text{g}/10^6$  cells at the optimal incubation concentration and time, which slightly higher than RILO@MG<sup>RAW</sup> ( $5.76 \pm 0.79$   $\mu\text{g}/10^6$  cells). However, there was no significant difference between them, which were analysed by the two-tailed Student's *t*-test. Data are expressed as the mean  $\pm$  SD with 3 biologically independent experiments. Two-way ANOVA with Tukey's multiple comparisons test (**a**, **c**) was carried out for statistical analysis.  $**P < 0.01$ ; ns, no significance.



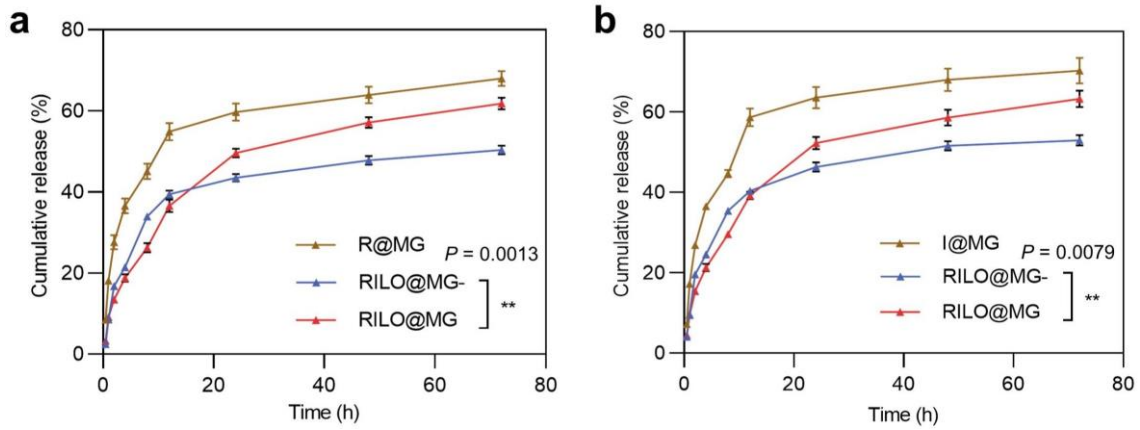

**Supplementary Fig. 6. Release profiles of total drugs from RILO@MG.** **a**, Release profiles during 72 h of total R488 from RILO@MG ( $n = 3$  biologically independent experiments). **b**, Release profiles during 72 h of total INCB from RILO@MG ( $n = 3$  biologically independent experiments). All data are shown as the mean  $\pm$  SD and the data were analysed by two-way ANOVA with Tukey's multiple comparisons test.  $**P < 0.01$ .

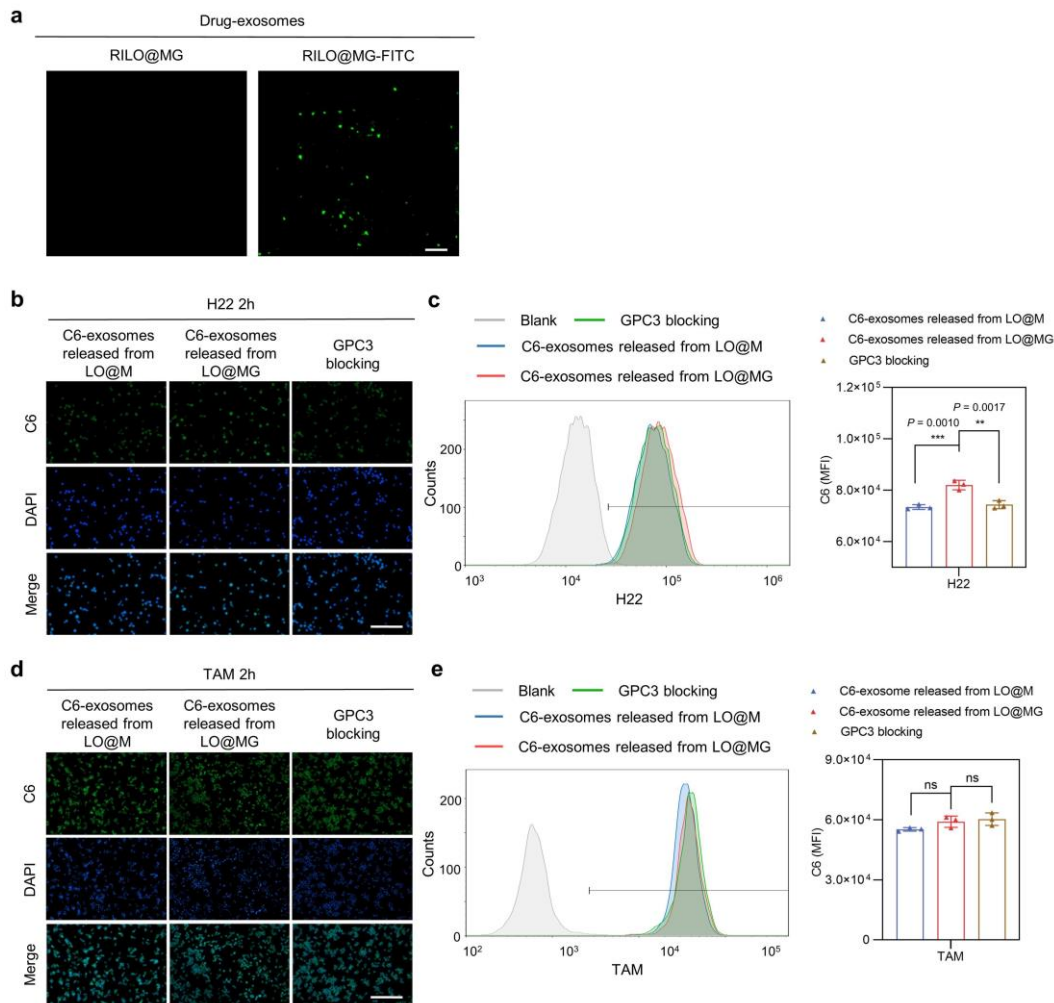

**Supplementary Fig. 7. The uptake experiments of C6-exosomes released from different formulations.** **a**, The ultra high resolution microscopy images of released exosomes ( $n = 3$  biologically independent experiments). The RI-exosomes generated cumulatively at 48 h from RILO@MG and RILO@MG-FITC were separated and collected by serial centrifugation and ultracentrifugation. The RI-exosomes were imaged using a ultra high resolution microscope (DeltaVision OMX Flex, GE HealthCare, NJ, USA). **b**, **c**, The uptake experiments of C6-exosomes released from different formulations by H22 cells. C6-exosomes released cumulatively at 48 h from LO@M and LO@MG were separated and collected for these experiments. Fluorescence microscopy images (**b**) and flow cytometric analysis (**c**) of the uptake of C6-exosomes released from LO@M, C6-exosomes released from LO@MG and GPC3 blocking groups by H22 cells for 2 h in the same concentration (200 ng/mL) of C6 ( $n = 3$  biologically independent experiments). **d**, **e**, The uptake experiments of C6-exosomes released from different formulations by TAM. C6-exosomes released cumulatively at 48 h from LO@M and LO@MG were separated and collected for these experiments. Fluorescence microscopy images (**a**) and flow cytometric analysis (**b**) of the uptake of C6-exosomes released from LO@M, C6-exosomes released from LO@MG and GPC3 blocking groups by TAMs for 2 h in the same concentration (200 ng/mL) of C6 ( $n = 3$  biologically independent experiments). All data are shown as the mean  $\pm$  SD and were analysed by one-way ANOVA with Tukey's multiple comparisons test. \*\* $P < 0.01$ ; \*\*\* $P < 0.001$ ; ns, no significance.

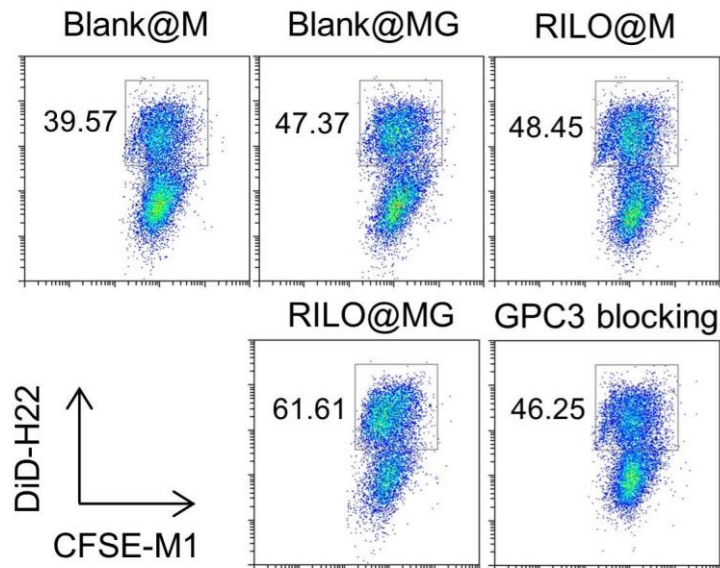

**Supplementary Fig. 8. Effect of anchoring of GTP on phagocytosis.** Representative flow cytometry plots related to Fig. 5c. DiD and CFSE were selected to label H22 cells and M1-type macrophages, respectively. The boxes within the plots showed the M1-type macrophages that phagocytized H22 cells ( $n = 3$  biologically independent experiments).

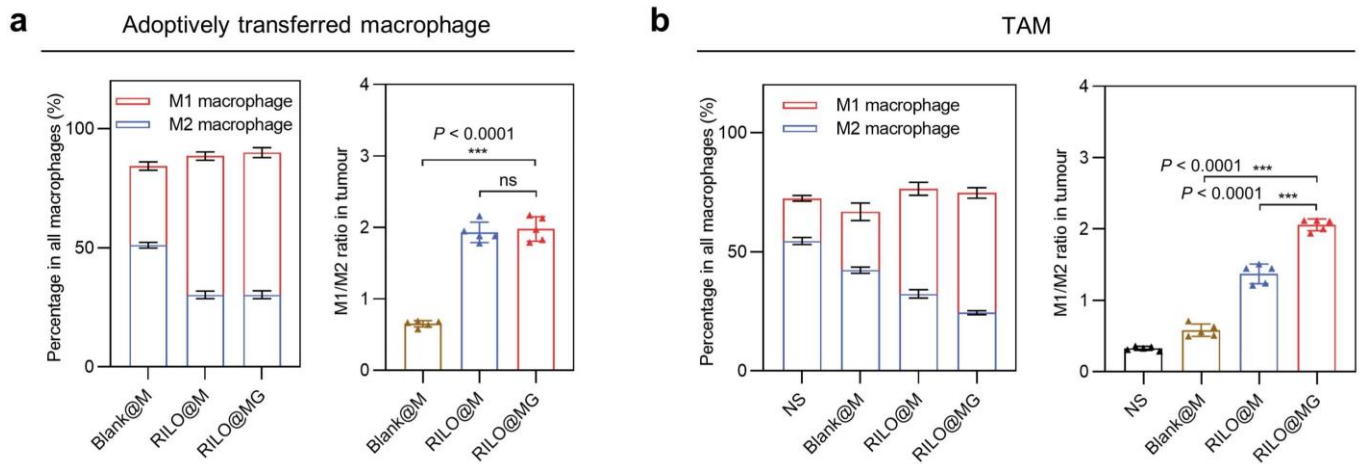

**Supplementary Fig. 9. The phenotype analysis of adoptively transferred macrophage and TAM after injection.** Mice inoculated with H22 cells were treated with adoptively transferred macrophage labeled with IVISense 680 fluorescent cell labeling dye. The intratumoural macrophage contained adoptively transferred macrophage and endogenous TAM, and the adoptively transferred macrophage could be distinguished by a flow cytometer. **a**, The phenotype analysis of adoptively transferred macrophage after i.v. administration with different formulations based on macrophages ( $n = 5$  biologically independent animals). **b**, The phenotype analysis of endogenous TAM after injection of groups related to **a** ( $n = 5$  biologically independent animals). All data are shown as the mean  $\pm$  SD and were analysed by one-way ANOVA with Tukey's multiple comparisons test. \*\*\* $P < 0.001$ ; ns, no significance.

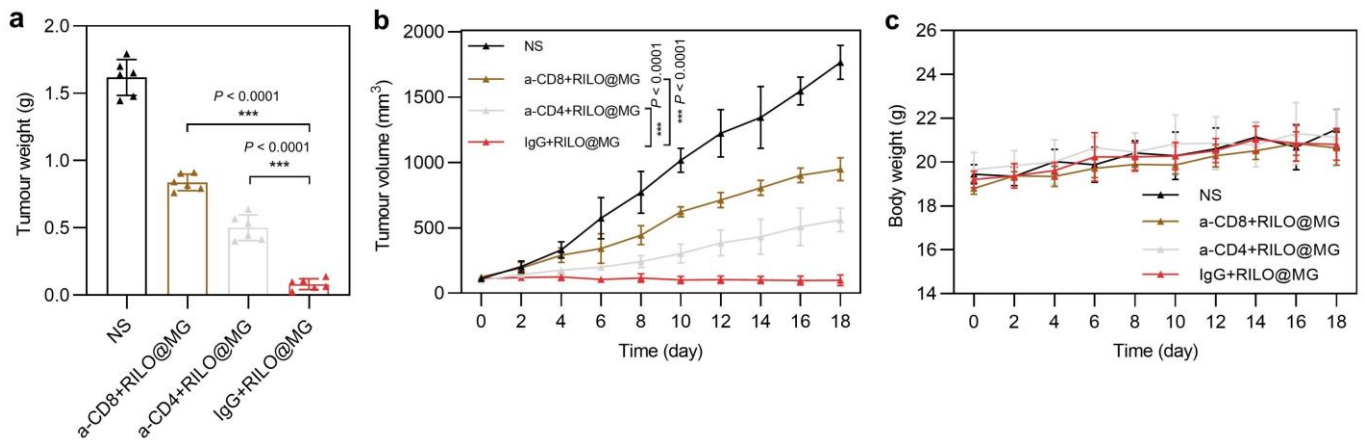

**Supplementary Fig. 10. Tumour weights, average tumour growth curves and body weight changes over the course of treatment related to Fig. 5k-m.** **a**, Tumour weights of H22 tumour-bearing mice ( $n = 6$  biologically independent animals per group). **b**, Average tumour growth curves of H22 tumour-bearing mice ( $n = 6$  biologically independent animals per group). **c**, body weight changes of H22 tumour-bearing mice ( $n = 6$  biologically independent animals per group). All data are shown as the mean  $\pm$  SD. One-way ANOVA with Tukey's multiple comparisons test (**a**) and two-way ANOVA with repeated measures (**b**) were carried out for statistical analysis. \*\*\* $P < 0.001$ .

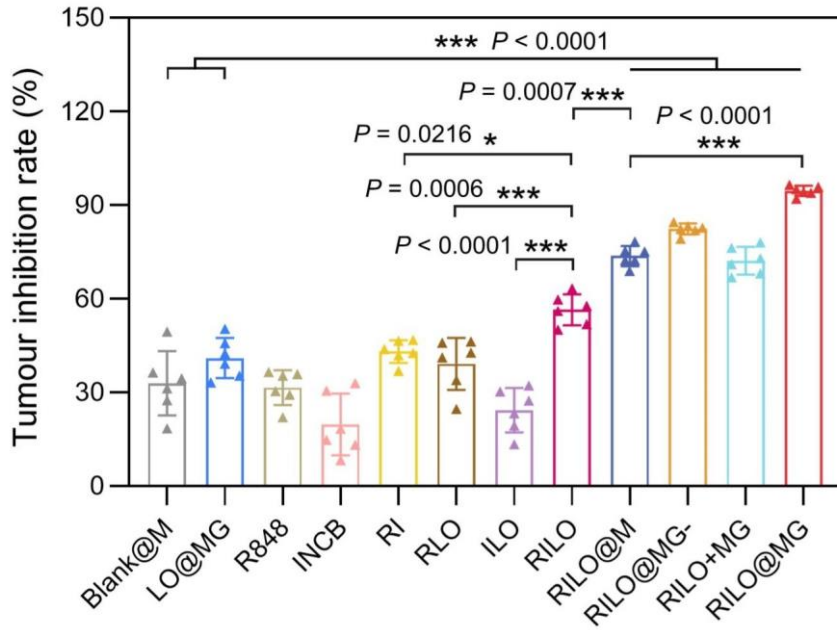

**Supplementary Fig. 11. Tumour inhibition rate calculated based on Fig. 6d.** All data are shown as the mean  $\pm$  SD with  $n = 6$  biologically independent animals. All data were analysed by one-way ANOVA with Tukey's multiple comparisons test. \* $P < 0.05$ ; \*\*\* $P < 0.001$ .

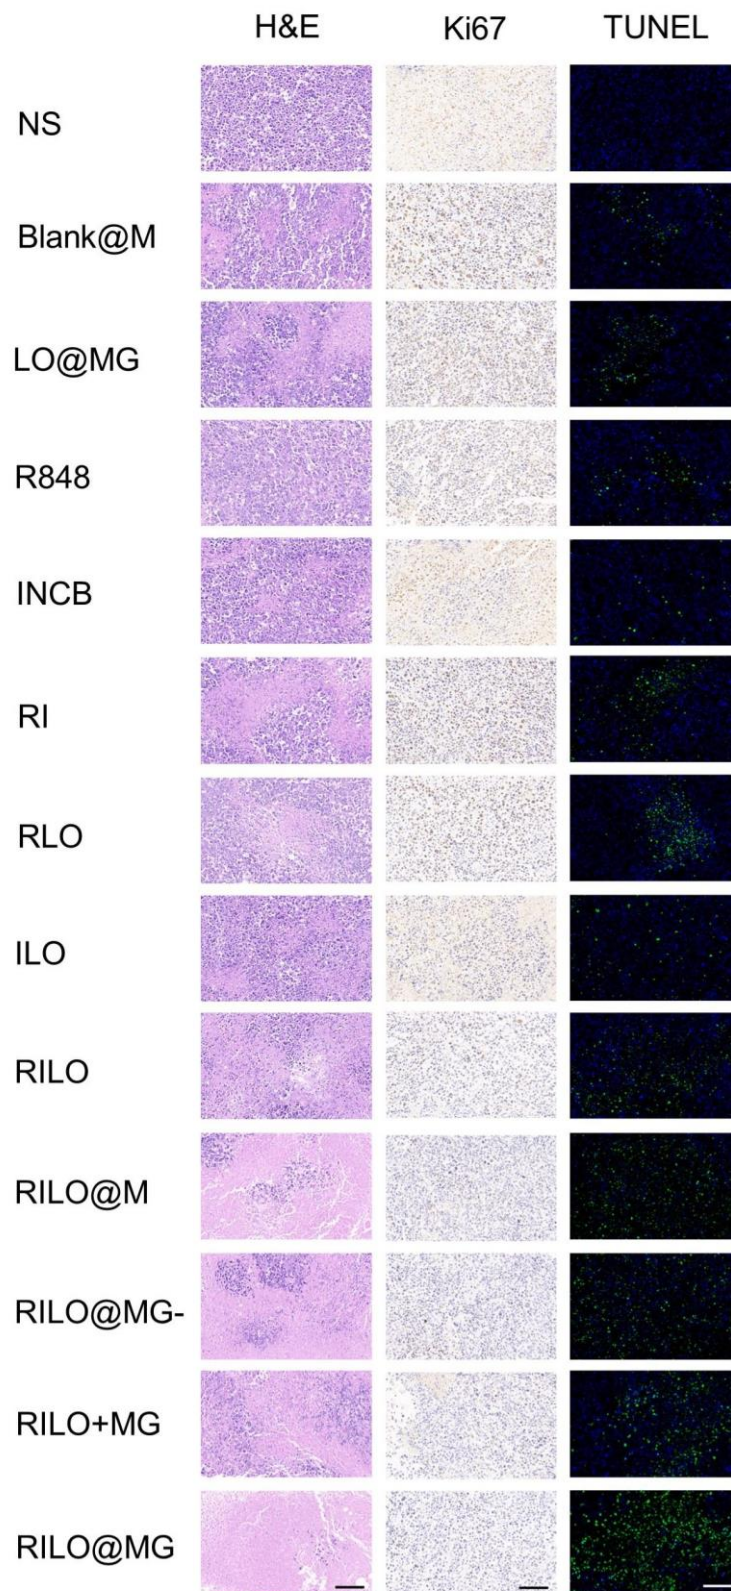

**Supplementary Fig. 12. Representative images of tumour tissue sections related to Fig. 6a-f.** Tumour tissues were obtained at the study endpoint. H&E, Ki67, and TUNEL staining were performed on tissue sections for pathological assessment ( $n = 3$  biologically independent experiments). Scale bar = 100  $\mu\text{m}$ .

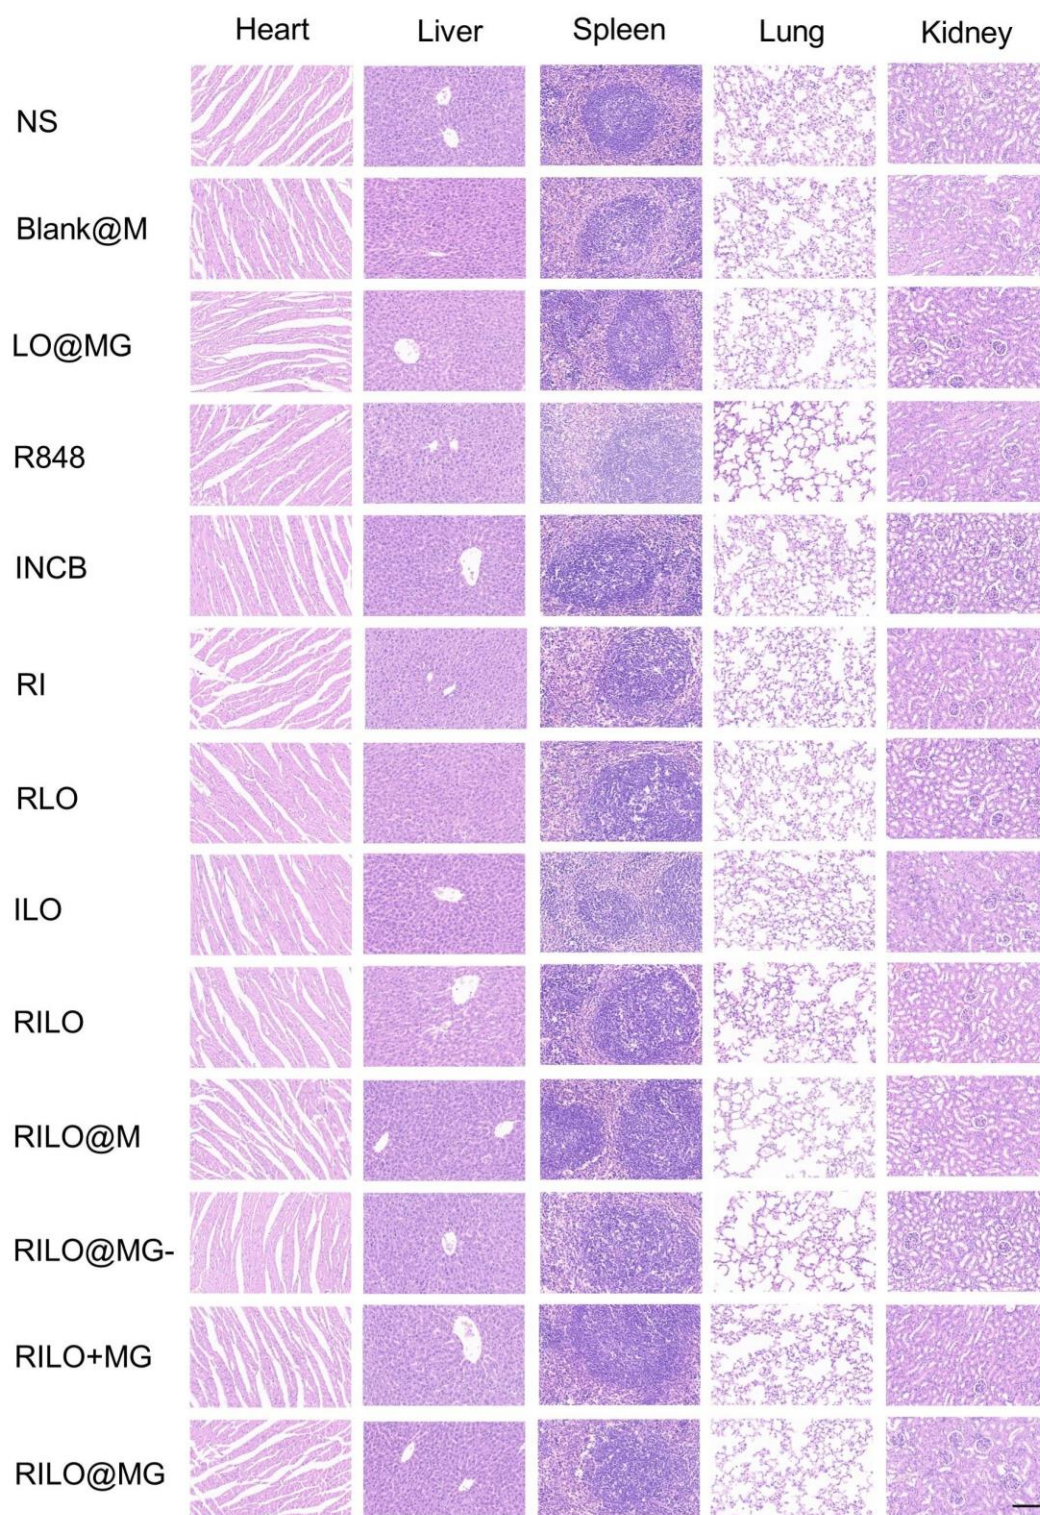

**Supplementary Fig. 13. Representative images of major organs by microscopic pathological analysis related to Fig. 6a-f.** Major organs were obtained at the study endpoint. H&E staining was performed on tissue sections for pathological assessment ( $n = 3$  biologically independent experiments). Scale bar, 100  $\mu\text{m}$ . No abnormal histological conditions (inflammation, necrosis, or structure changes) were reported and no differences between groups were observed.



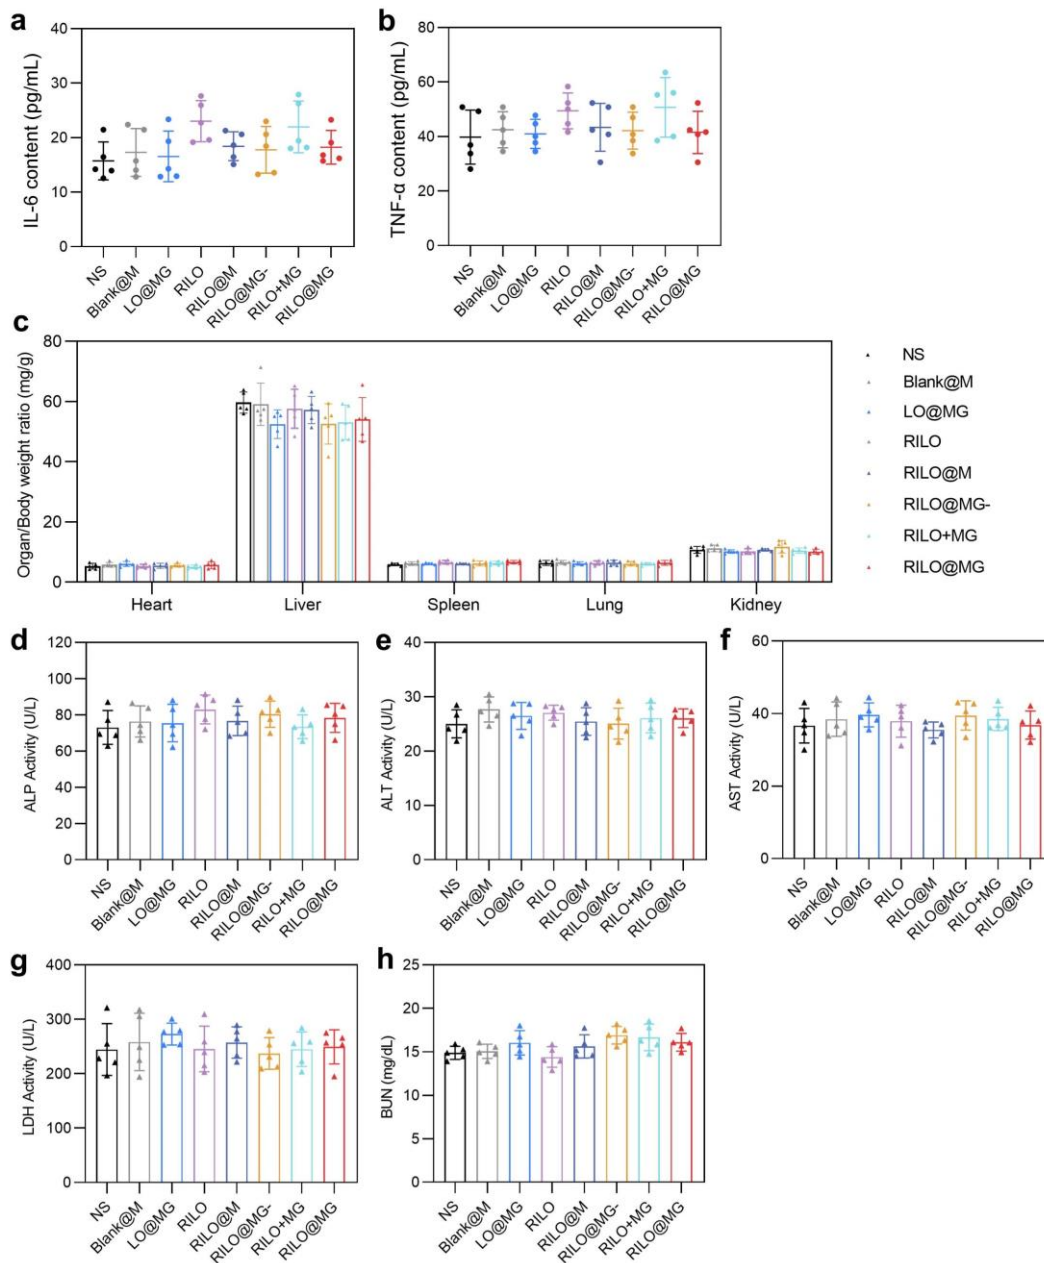

**Supplementary Fig. 14. Preliminary safety evaluation of RILO@MG.** **a, b**, Serum cytokine assessment after first i.v. administration. H22 tumour-bearing mice were i.v. administration at a dosage of  $3.0 \times 10^6$  cells per mouse per injection, equal to 4 mg/kg R848 and 3.4 mg/kg INCB. Mice requiring injected formulations made by M1-type macrophages each received the equivalent number of cells ( $3.0 \times 10^6$  cells per mouse). Mice requiring injected other formulations each received the equivalent dose of medicine (4 mg/kg R848 and 3.4 mg/kg INCB). Serum cytokine concentrations including IL-6 (**a**) and TNF- $\alpha$  (**b**) were assessed at 48 h after the first injection. **c**, Organ/body weight ratio at the study endpoint related to Fig. 6a-f. Major organs were obtained at the study endpoint. **d-h**, Safety evaluation by liver and kidney function test related to Fig. 6a-f. Liver function indices including ALP (**d**), ALT (**e**), AST (**f**) and LDH (**g**), and kidney function index BUN (**h**) were assayed at the study endpoint. All data are shown as the mean  $\pm$  SD with  $n = 5$  biologically independent animals.

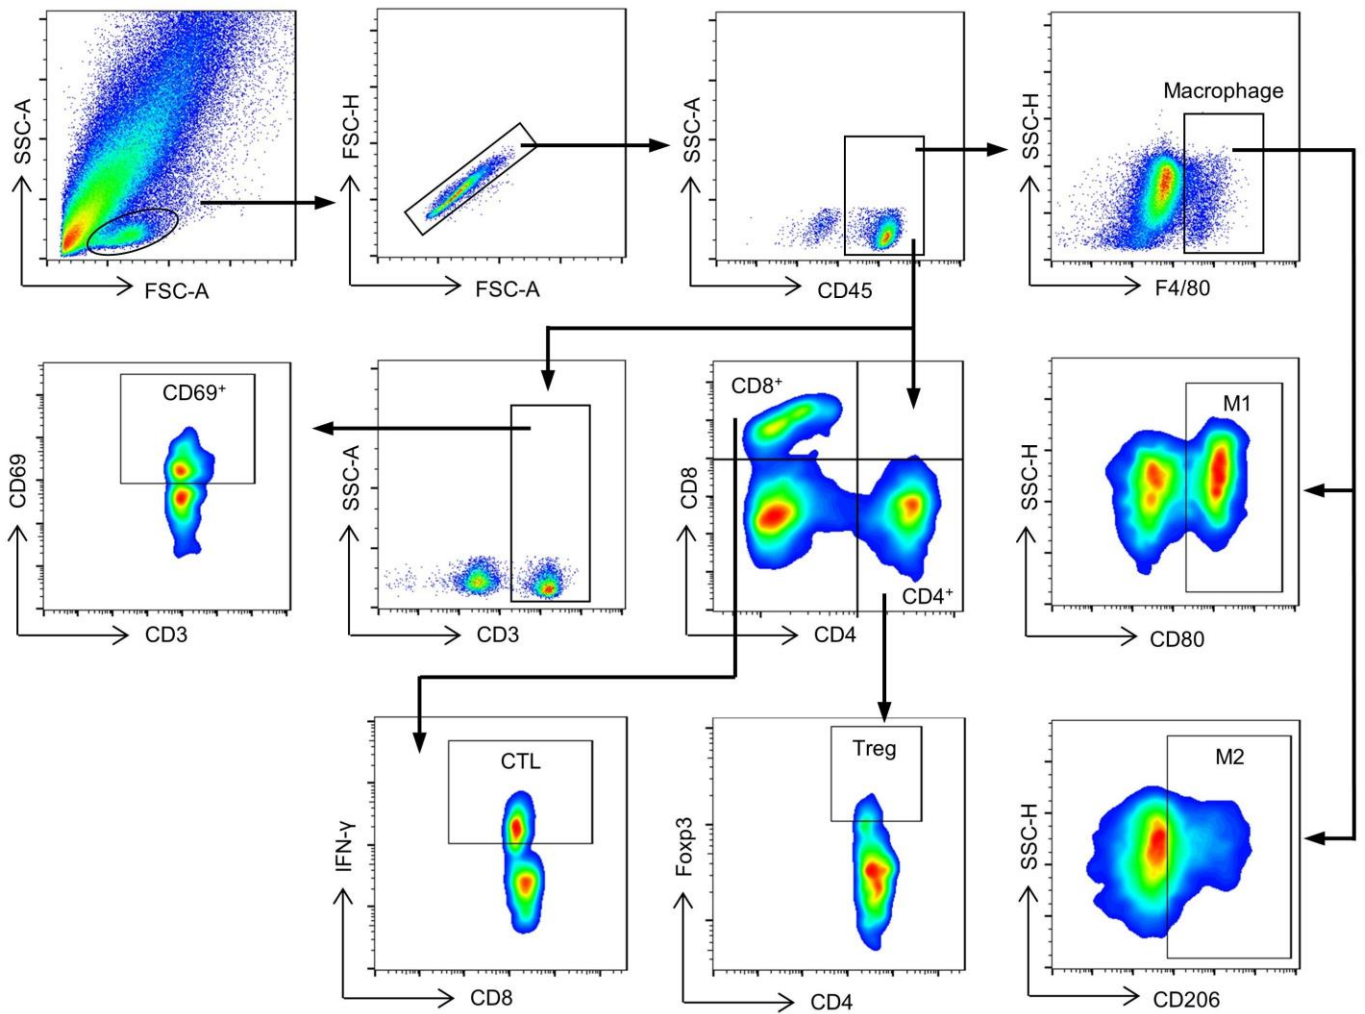

**Supplementary Fig. 15. Flow cytometry gating strategy for analysis of intratumoural immune cells.** Gating strategy for identifying CD4<sup>+</sup> T (CD45<sup>+</sup>CD4<sup>+</sup>) cells, CD8<sup>+</sup> T (CD45<sup>+</sup>CD8<sup>+</sup>) cells, CD69<sup>+</sup> T (CD45<sup>+</sup>CD3<sup>+</sup>CD69<sup>+</sup>) cells, CTL (CD45<sup>+</sup>CD8<sup>+</sup>IFN- $\gamma$ <sup>+</sup>), Treg (CD45<sup>+</sup>CD4<sup>+</sup>Foxp3<sup>+</sup>), M1-type macrophage (CD45<sup>+</sup>F4/80<sup>+</sup>CD80<sup>+</sup>) and M2-type macrophage (CD45<sup>+</sup>F4/80<sup>+</sup>CD206<sup>+</sup>) in the TME presented on Fig. 7c-i, Fig. 8e-h, Fig. 8l-o.

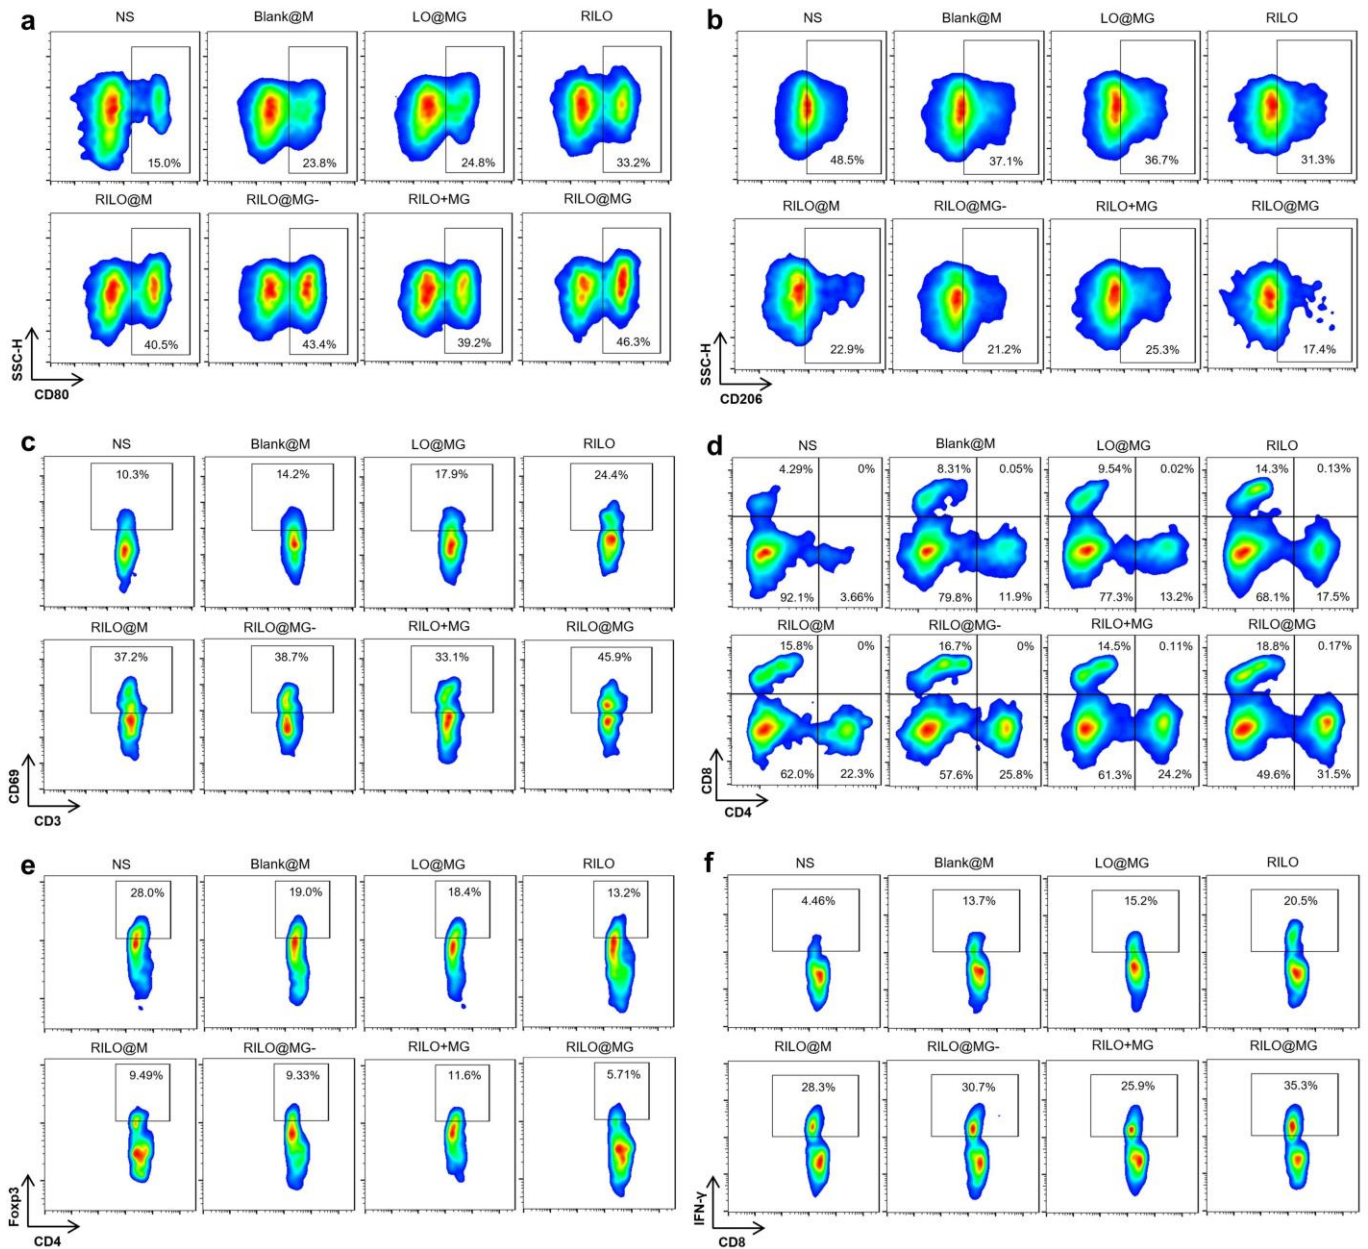

**Supplementary Fig. 16. Representative flow cytometry plots related to Fig. 7c-i.** Representative flow cytometry plots of intratumoural M1-type macrophage (a), M2-type macrophage (b), CD69<sup>+</sup> T cells (c), CD4<sup>+</sup> T cells (d), CD8<sup>+</sup> T cells (d), CD4<sup>+</sup>Foxp3<sup>+</sup> T cells (e) and CD8<sup>+</sup>IFN-γ<sup>+</sup> T cells (f).

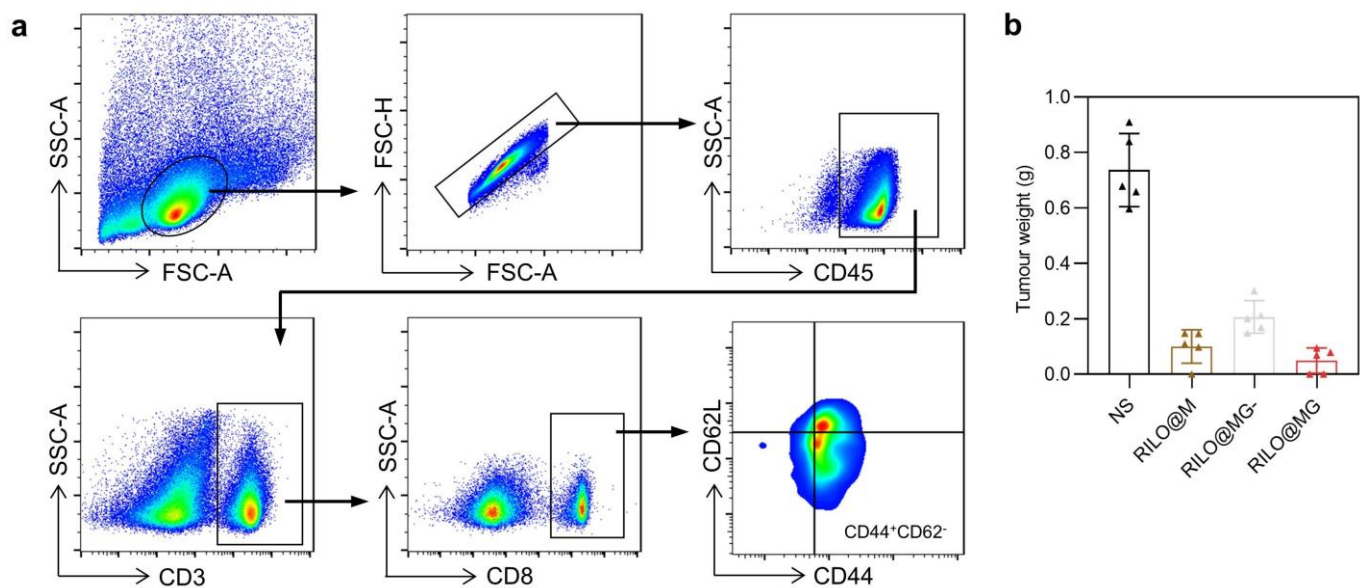

**Supplementary Fig. 17. The evaluation of effector memory cells and memory immune responses. a**, Gating strategy for identifying effector memory (CD44<sup>+</sup>CD62L<sup>-</sup>) CD8<sup>+</sup> T cells in spleens related to Fig. 7j. **b**, Tumour weights of re-challenged tumour related to Fig. 7k-m. All data are shown as the mean  $\pm$  SD with  $n = 5$  biologically independent animals.

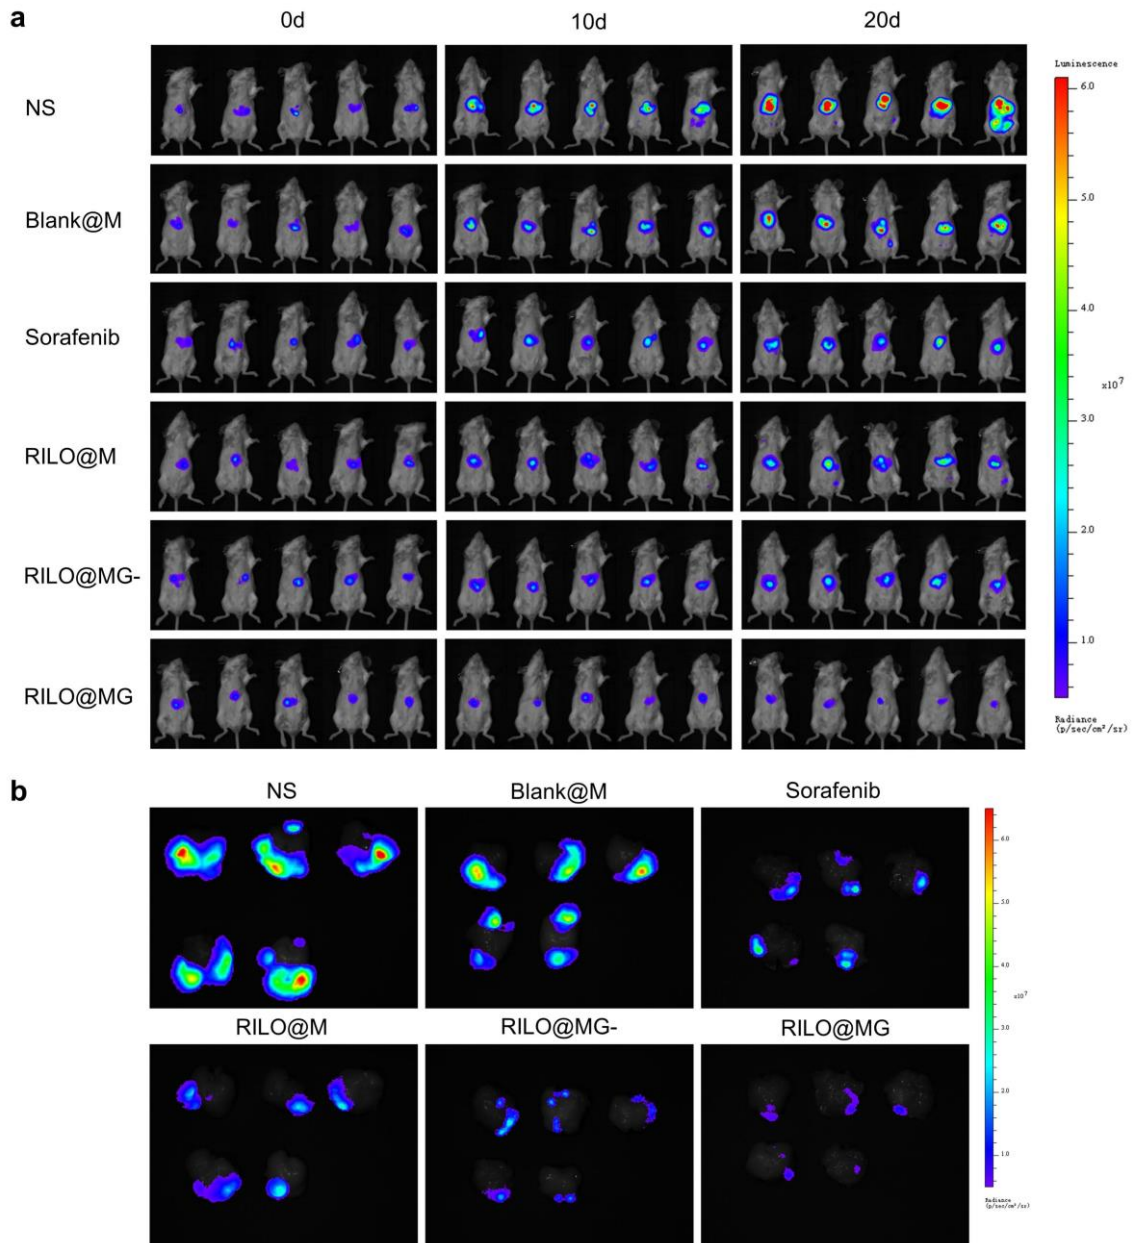

**Supplementary Fig. 18. Efficacy validation in the orthotopic H22 tumour model related to Fig. 8a.** **a**, In vivo bioluminescence images of orthotopic H22 tumour model related to Fig. 8a ( $n = 5$  biologically independent animals). **b**, Ex vivo images of livers in the orthotopic H22 tumour model on Day 20 related to Fig. 8a ( $n = 5$  biologically independent animals).

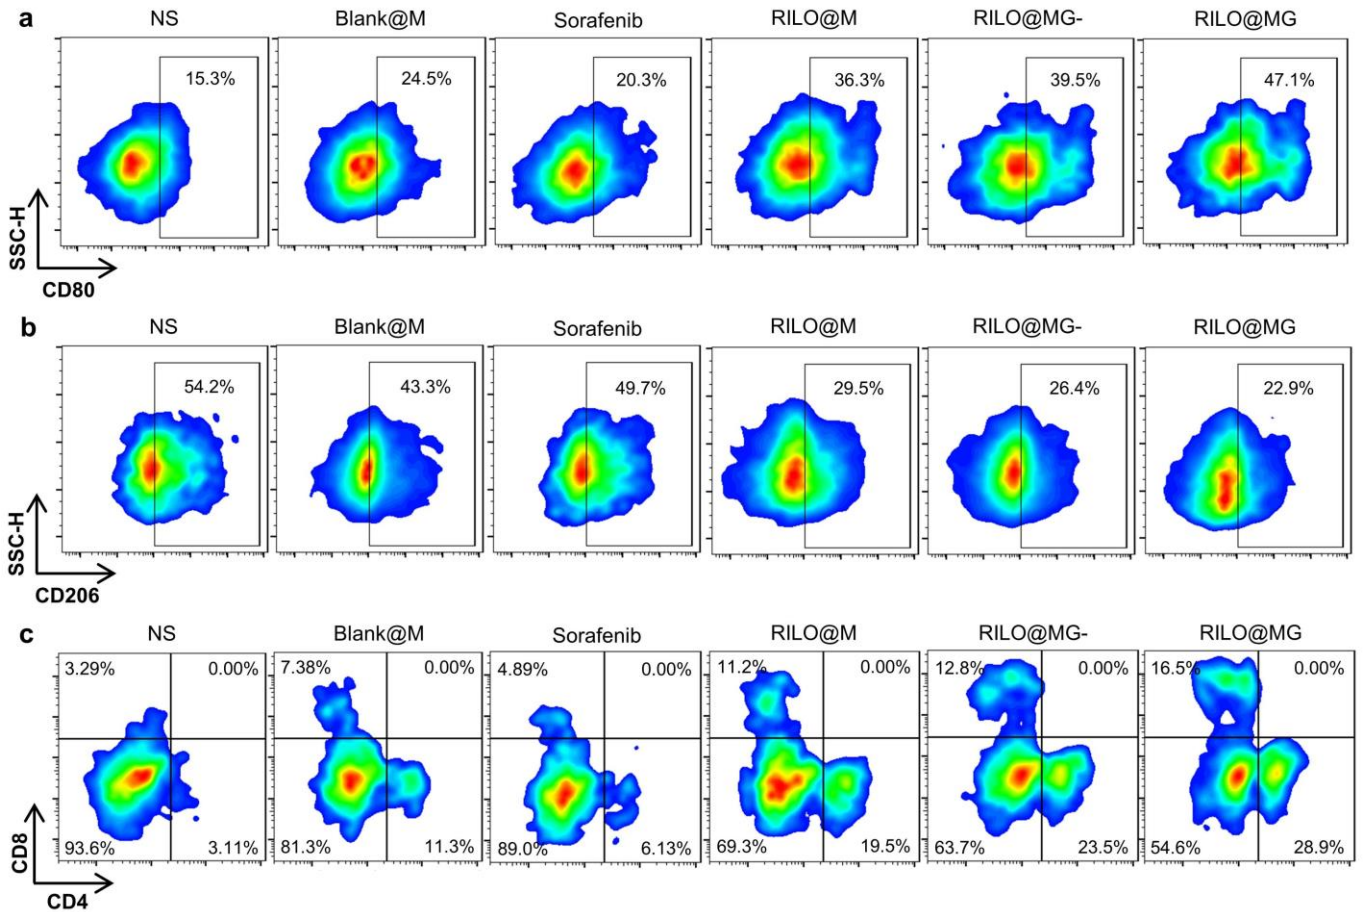

**Supplementary Fig. 19. Flow cytometry data in the orthotopic H22 tumour model on Day 20 related to Fig. 8a. Representative flow cytometry plots of M1-type macrophage (a), M2-type macrophage (b), CD4<sup>+</sup> and CD8<sup>+</sup> T cells (c) in tumours of mice sacrificed on Day 20.**

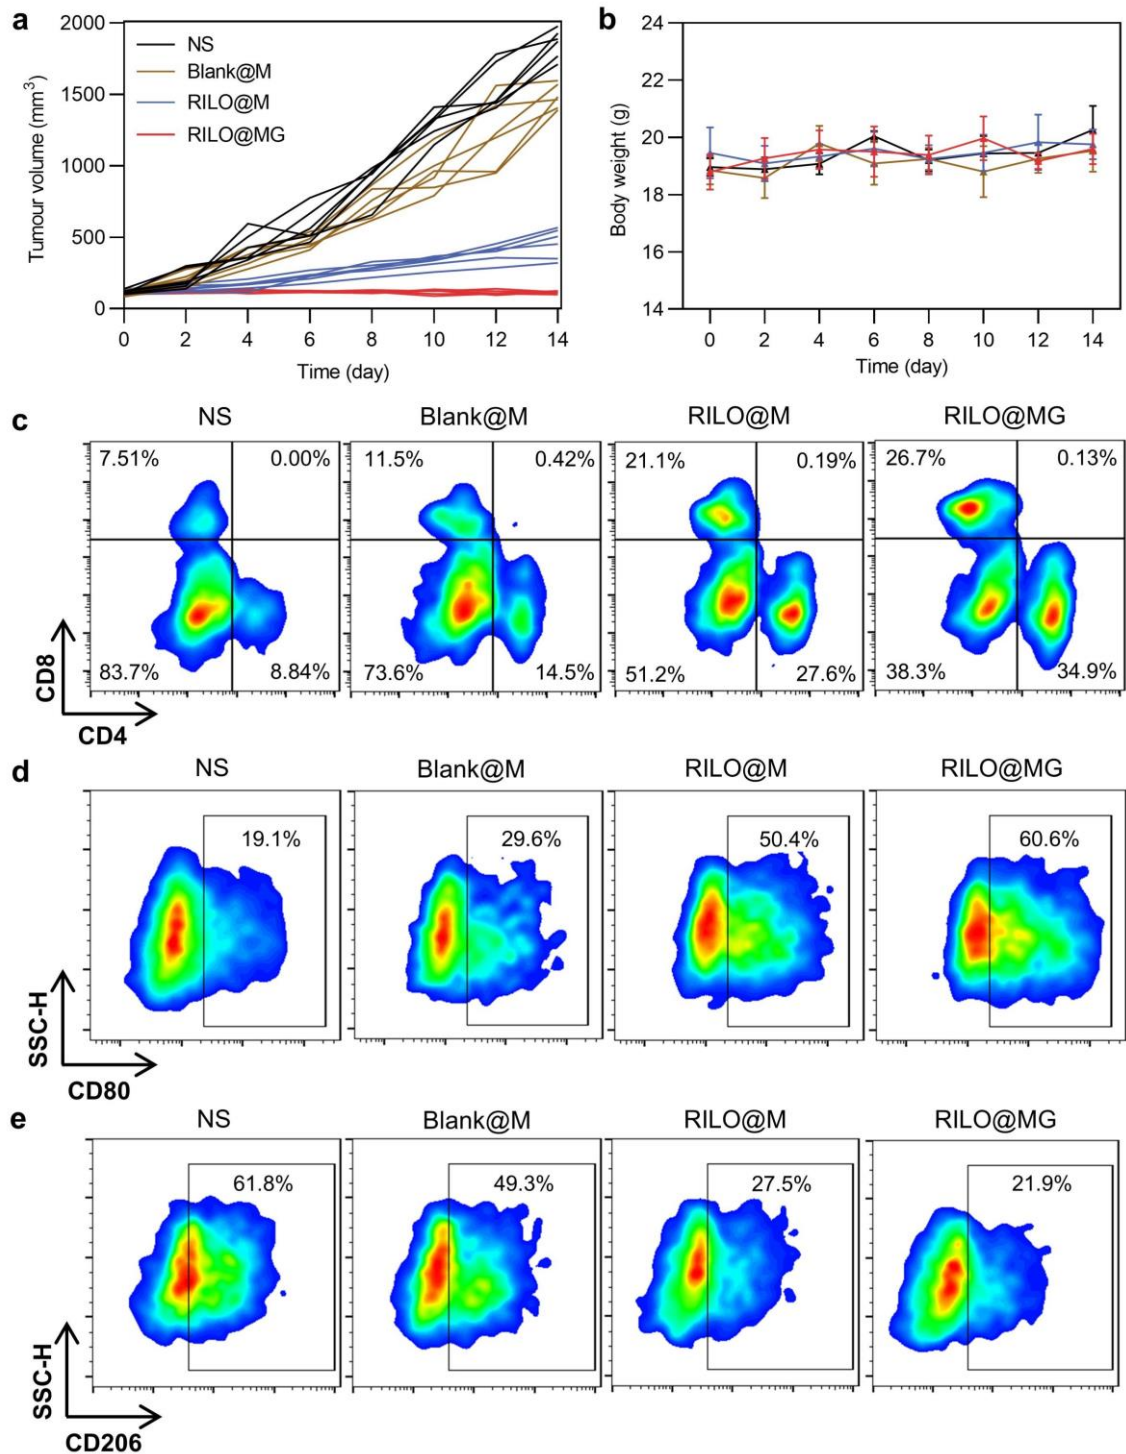

**Supplementary Fig. 20. Tumour growth curves, body weight changes and flow cytometry data in the B16F10 tumour-bearing mouse model over the course of treatment related to Fig. 8i-o.** **a-b**, Tumour growth curves (**a**) and body weight changes (**b**) of tumour-bearing mice were monitored over time ( $n = 6$  biologically independent animals). **c-e**, Representative flow cytometry plots of CD4<sup>+</sup> and CD8<sup>+</sup> T cells (**c**), M1-type macrophage (**d**) and M2-type macrophage (**e**) in tumours of mice sacrificed. All data are shown as the mean  $\pm$  SD.

**Supplementary Table 1. Characterization of RIL, OMV and RILO.** All data are shown as the mean  $\pm$  SD with  $n = 3$  biologically independent experiments.

|      | Size (nm)          | PDI               | Zeta potential (mV) | DL of R848(%)     | EE of R848(%)      | DL of INCB(%)     | EE of INCB(%)      |
|------|--------------------|-------------------|---------------------|-------------------|--------------------|-------------------|--------------------|
| RIL  | 41.373 $\pm$ 0.888 | 0.175 $\pm$ 0.003 | -2.528 $\pm$ 0.285  | 6.314 $\pm$ 0.103 | 96.529 $\pm$ 1.739 | 6.469 $\pm$ 0.046 | 98.900 $\pm$ 0.862 |
| OMV  | 39.627 $\pm$ 1.732 | 0.248 $\pm$ 0.036 | -11.967 $\pm$ 0.404 | —                 | —                  | —                 | —                  |
| RILO | 50.541 $\pm$ 0.404 | 0.137 $\pm$ 0.028 | -7.443 $\pm$ 0.308  | 6.167 $\pm$ 0.022 | 97.659 $\pm$ 0.244 | 5.134 $\pm$ 0.145 | 81.303 $\pm$ 2.413 |

DL, drug loading; EE, encapsulation efficiency.



**Supplementary Table 2. Proteins identified from *E. coli* MG1655-originated OMV.**

| Index | Accession  | Description                                                   | Molecular Weight (kDa) | Localization   | Unique Peptides | Score  |
|-------|------------|---------------------------------------------------------------|------------------------|----------------|-----------------|--------|
| 1     | A0A484YCL0 | 60 kDa chaperonin                                             | 32.9                   | cytoplasm      | 4               | 182.34 |
| 2     | A0A7H5D811 | Major outer membrane lipoprotein Lpp                          | 8.2                    | secreted       | 2               | 148.77 |
| 3     | A0A6M0PGA3 | 60 kDa chaperonin                                             | 57.1                   | —              | 2               | 105.28 |
| 4     | A0A377E6N8 | Peptidoglycan-associated protein                              | 16.8                   | outer membrane | 3               | 90.67  |
| 5     | A0A377D7F4 | Outer membrane protein W                                      | 16.2                   | secreted       | 3               | 88.75  |
| 6     | A0A7B1D042 | Tol-Pal system protein TolB                                   | 45.9                   | —              | 6               | 88.47  |
| 7     | D3H492     | Pyruvate dehydrogenase E1 component                           | 99.6                   | cytoplasm      | 12              | 87.5   |
| 8     | A0A376MKW3 | 30S ribosomal protein S3                                      | 38.5                   | cytoplasm      | 6               | 87.19  |
| 9     | A0A7L5L019 | Scaffolding protein MipA                                      | 27.8                   | —              | 4               | 84.72  |
| 10    | A0A2T1LF33 | 50S ribosomal protein L13                                     | 16                     | cytoplasm      | 3               | 81.99  |
| 11    | A0A3L5QC40 | 50S ribosomal protein L10                                     | 17.7                   | —              | 4               | 78.14  |
| 12    | A0A4S1UEN8 | Outer membrane protein X                                      | 18.6                   | outer membrane | 8               | 75.01  |
| 13    | A0A2H9EUL1 | Acetyltransferase component of pyruvate dehydrogenase complex | 65.9                   | periplasm      | 10              | 51.74  |
| 14    | A0A5B9AL25 | Nucleoside-specific channel-forming protein Tsx               | 33.5                   | outer membrane | 4               | 50.86  |
| 15    | A0A077K781 | 30S ribosomal protein S13                                     | 13.1                   | cytoplasm      | 3               | 45.4   |
| 16    | A0A7B7E5I8 | Pectinesterase                                                | 46                     | —              | 4               | 44.23  |
| 17    | A0A790ETA7 | 30S ribosomal protein S2                                      | 26.7                   | —              | 6               | 36.78  |
| 18    | A0A7X1MK38 | Dihydrolipoyl dehydrogenase                                   | 50.7                   | —              | 6               | 34.67  |
| 19    | F4NDT5     | Outer membrane protein N                                      | 40.4                   | outer membrane | 6               | 33.5   |
| 20    | A0A7L7M1X0 | 30S ribosomal protein S18                                     | 9                      | —              | 2               | 32.46  |
| 21    | A0A6N7NKH4 | Flagellin                                                     | 29.6                   | —              | 4               | 31.55  |
| 22    | A0A5N3D5X6 | Class I fructose-bisphosphate aldolase                        | 38.1                   | secreted       | 3               | 28.14  |
| 23    | A0A6D0BSJ5 | Penicillin-binding protein activator LpoA                     | 72.8                   | secreted       | 5               | 27.88  |
| 24    | F4NR29     | Vitamin B12 transporter BtuB                                  | 70.1                   | outer membrane | 6               | 26.3   |
| 25    | A0A3W3FCN8 | Lysine decarboxylase CadA                                     | 81.3                   | —              | 4               | 25.49  |

|    |            |                                                     |      |                |   |       |
|----|------------|-----------------------------------------------------|------|----------------|---|-------|
| 26 | A0A6N7NB27 | Uncharacterized protein                             | 8.8  | —              | 3 | 25.38 |
| 27 | A0A7A5XKP8 | Phospholipase A1                                    | 33.2 | —              | 2 | 24.67 |
| 28 | A0A781I9J6 | Ferritin                                            | 19.4 | —              | 2 | 24.26 |
| 29 | A0A2X5PTL6 | Catalase-peroxidase                                 | 80   | cytoplasm      | 7 | 22.89 |
| 30 | A0A6N7NE99 | OmpA family protein                                 | 37   | —              | 2 | 21.84 |
| 31 | A0A192ETE7 | Outer membrane channel protein TolC                 | 53.7 | —              | 4 | 21.57 |
| 32 | A0A7U6ALM1 | Aspartate ammonia-lyase                             | 52.3 | —              | 7 | 18.76 |
| 33 | A0A376PV44 | Phage major head protein (Major coat protein)       | 38   | secreted       | 2 | 18.11 |
| 34 | A0A776VE75 | OmpT family outer membrane protease OmpT (Fragment) | 21   | —              | 4 | 17.95 |
| 35 | A0A798ME49 | 30S ribosomal protein S20                           | 9.7  | —              | 2 | 17.91 |
| 36 | D3QUE6     | Acid stress chaperone HdeB                          | 12.5 | —              | 2 | 17.04 |
| 37 | V0X8C4     | 30S ribosomal protein S9                            | 9.7  | cytoplasm      | 2 | 16.46 |
| 38 | A0A3Y1JDX7 | Maltose operon protein MalM                         | 32   | —              | 2 | 16.45 |
| 39 | A0A377N362 | FimH protein                                        | 31.4 | fimbrium       | 3 | 15.76 |
| 40 | A0A0K4G3J8 | 50S ribosomal protein L7/L12                        | 12.3 | periplasm      | 3 | 14.36 |
| 41 | A0A7D7E3Q2 | Peptidyl-prolyl cis-trans isomerase                 | 28.9 | —              | 3 | 13.92 |
| 42 | A0A782HTS0 | Formate C-acetyltransferase                         | 85.3 | —              | 3 | 12.84 |
| 43 | F4NKN4     | Inorganic pyrophosphatase                           | 19.7 | cytoplasm      | 4 | 12.65 |
| 44 | A0A5E9Z9X9 | Uridine phosphorylase                               | 27.3 | cytoplasm      | 3 | 11.92 |
| 45 | A0A377BAB4 | 50S ribosomal protein L20                           | 9.3  | secreted       | 2 | 10.59 |
| 46 | A0A785J6P1 | Lysine--tRNA ligase                                 | 57.8 | —              | 2 | 10.49 |
| 47 | A0A7D7DZR1 | Outer membrane protein assembly factor BamA         | 90.6 | outer membrane | 4 | 10.3  |
| 48 | D6I8V0     | Predicted protein                                   | 36.8 | secreted       | 2 | 9.81  |
| 49 | A0A376MMR1 | Glutamine synthetase                                | 43.7 | cytoplasm      | 3 | 9.78  |
| 50 | A0A376VBV1 | Bacterioferritin                                    | 18.4 | cytoplasm      | 2 | 9.21  |
| 51 | A0A377DBF7 | Bacterioferritin                                    | 18.3 | cytoplasm      | 3 | 8.66  |
| 52 | A0A7H9QT58 | DUF883 domain-containing protein                    | 11   | inner membrane | 2 | 7.94  |
| 53 | A0A7T8PU92 | Pyruvate kinase PykF                                | 50.7 | —              | 4 | 7.27  |

|    |            |                                                          |       |           |   |      |
|----|------------|----------------------------------------------------------|-------|-----------|---|------|
| 54 | A0A782LSB2 | Glutamine ABC transporter substrate-binding protein GlnH | 27.2  | —         | 2 | 6.84 |
| 55 | A0A2A2CDP9 | Putrescine-binding periplasmic protein                   | 38.9  | periplasm | 2 | 6.63 |
| 56 | A0A243UWG9 | Thiol:disulfide interchange protein DsbA (Fragment)      | 22.2  | —         | 3 | 6.62 |
| 57 | A0A4T5REM4 | 6-phosphogluconate dehydrogenase, decarboxylating        | 51.4  | secreted  | 2 | 6.46 |
| 58 | A0A774CSQ3 | Uncharacterized protein                                  | 11.4  | —         | 2 | 6.33 |
| 59 | A0A7Z6SEK6 | Elongation factor Tu (Fragment)                          | 35.4  | —         | 2 | 6.2  |
| 60 | A0A786ZMQ2 | 50S ribosomal protein L1                                 | 24.7  | —         | 2 | 6.09 |
| 61 | A0A7D7H5M8 | Purine nucleoside phosphorylase DeoD-type                | 26    | cytoplasm | 2 | 5.99 |
| 62 | A0A7B4KCG4 | Chaperone protein DnaK                                   | 69.1  | —         | 2 | 5.92 |
| 63 | A0A271UAW6 | Catabolite activator protein                             | 23.6  | —         | 2 | 5.87 |
| 64 | A0A4Z0TLW4 | Murein hydrolase activator NlpD                          | 40.1  | secreted  | 2 | 5.55 |
| 65 | A0A6G6L5Y7 | DNA protection during starvation protein                 | 18.7  | —         | 3 | 4.81 |
| 66 | W1X2L6     | DNA-directed RNA polymerase subunit (Fragment)           | 133.9 | cytoplasm | 2 | 4.65 |
| 67 | A0A6N7NPD3 | Catalase                                                 | 78.1  | —         | 2 | 3.79 |
| 68 | A0A377CUE3 | Ribonucleoside-diphosphate reductase                     | 85.7  | secreted  | 2 | 3.59 |
| 69 | A0A2X1K7V0 | Glyceraldehyde 3-phosphate dehydrogenase A               | 15.3  | cytoplasm | 2 | 3.03 |
| 70 | C3TPA2     | Lipoprotein                                              | 29.4  | secreted  | 2 | 2.43 |
| 71 | A0A7B9W8N5 | Glutamine--tRNA ligase                                   | 63.5  | —         | 2 | 1.76 |

**Supplementary Table 3. Characterization of exosomes from Blank@M and RI-exosomes from RILO@MG- and RILO@MG.** All data are shown as the mean  $\pm$  SD with  $n = 3$  biologically independent experiments.

|          | Size (nm)          | Zeta potential (mV) |
|----------|--------------------|---------------------|
| Blank@M  | 76.587 $\pm$ 4.750 | -10.233 $\pm$ 0.208 |
| RILO@MG- | 89.357 $\pm$ 4.106 | -8.550 $\pm$ 0.295  |
| RILO@MG  | 87.573 $\pm$ 4.208 | -8.770 $\pm$ 0.276  |
